# Supplementary material for: The driving effects of common atmospheric molecules for formation of clusters: the case of sulfuric acid, nitric acid, hydrochloric acid, ammonia, and dimethylamine
Source: Royal Society of Chemistry journal article supplement (doi:10.1039/d3ea00118k), 2023-01-01
Supplement: d3ea00118k1.zip [file d3ea00118k1.zip]

## Sheet: (SA)(FA)(NA)
0-waters:
	Structure	ωB97X-D/6-31++G** Electronic Energy (Hartrees)	ωB97X-D/6-31++G** Gº Correction 216.65 K (kcal/mol)	ωB97X-D/6-31++G** Gº Correction 273.15 K (kcal/mol)	ωB97X-D/6-31++G** Gº Correction 298.15 K (kcal/mol)	DLPNO-CCSD(T)/cc-pVDZ //ωB97X-D/6-31++G** (Hartrees)	DLPNO-CCSD(T)/cc-pVTZ //ωB97X-D/6-31++G** (Hartrees)	DLPNO-CCSD(T)/cc-pVQZ //ωB97X-D/6-31++G** (Hartrees)
	(SA)(FA)(NA)-I	-1170.7	45.743	39.18	36.107	-1168.57	-1169.49	-1169.77
1-water:
	Structure	ωB97X-D/6-31++G** Electronic Energy (Hartrees)	ωB97X-D/6-31++G** Gº Correction 216.65 K (kcal/mol)	ωB97X-D/6-31++G** Gº Correction 273.15 K (kcal/mol)	ωB97X-D/6-31++G** Gº Correction 298.15 K (kcal/mol)	DLPNO-CCSD(T)/cc-pVDZ //ωB97X-D/6-31++G** (Hartrees)	DLPNO-CCSD(T)/cc-pVTZ //ωB97X-D/6-31++G** (Hartrees)	DLPNO-CCSD(T)/cc-pVQZ //ωB97X-D/6-31++G** (Hartrees)
	(SA)(FA)(NA)(W)-I	-1247.13	59.076	51.666	48.185	-1244.83	-1245.84	-1246.15
	(SA)(FA)(NA)(W)-II	-1247.13	59.386	52.042	48.59	-1244.84	-1245.84	-1246.15
	(SA)(FA)(NA)(W)-III	-1247.13	59.315	51.955	48.496	-1244.83	-1245.84	-1246.15
	(SA)(FA)(NA)(W)-IV	-1247.13	59.374	52.031	48.579	-1244.83	-1245.84	-1246.15
	(SA)(FA)(NA)(W)-V	-1247.13	58.825	51.389	47.896	-1244.83	-1245.84	-1246.15
2-waters:
	Structure	ωB97X-D/6-31++G** Electronic Energy (Hartrees)	ωB97X-D/6-31++G** Gº Correction 216.65 K (kcal/mol)	ωB97X-D/6-31++G** Gº Correction 273.15 K (kcal/mol)	ωB97X-D/6-31++G** Gº Correction 298.15 K (kcal/mol)	DLPNO-CCSD(T)/cc-pVDZ //ωB97X-D/6-31++G** (Hartrees)	DLPNO-CCSD(T)/cc-pVTZ //ωB97X-D/6-31++G** (Hartrees)	DLPNO-CCSD(T)/cc-pVQZ //ωB97X-D/6-31++G** (Hartrees)
	(SA)(FA)(NA)(W)2-I	-1323.56	72.832	64.687	60.847	-1321.1	-1322.19	-1322.52
	(SA)(FA)(NA)(W)2-II	-1323.56	72.628	64.441	60.582	-1321.1	-1322.19	-1322.52
	(SA)(FA)(NA)(W)2-III	-1323.56	72.562	64.346	60.474	-1321.1	-1322.19	-1322.52
	(SA)(FA)(NA)(W)2-IV	-1323.56	72.503	64.269	60.39	-1321.1	-1322.19	-1322.52
	(SA)(FA)(NA)(W)2-V	-1323.56	72.795	64.63	60.781	-1321.1	-1322.19	-1322.52
	(SA)(FA)(NA)(W)2-VI	-1323.56	72.983	64.861	61.031	-1321.1	-1322.19	-1322.52
	(SA)(FA)(NA)(W)2-VII	-1323.56	72.88	64.731	60.89	-1321.1	-1322.19	-1322.52
	(SA)(FA)(NA)(W)2-VIII	-1323.56	72.797	64.638	60.792	-1321.1	-1322.19	-1322.52
	(SA)(FA)(NA)(W)2-IX	-1323.56	72.804	64.633	60.782	-1321.09	-1322.19	-1322.52
	(SA)(FA)(NA)(W)2-X	-1323.56	72.824	64.653	60.801	-1321.09	-1322.19	-1322.52
	(SA)(FA)(NA)(W)2-XI	-1323.56	72.771	64.593	60.737	-1321.09	-1322.19	-1322.52
	(SA)(FA)(NA)(W)2-XII	-1323.56	72.865	64.713	60.87	-1321.1	-1322.19	-1322.52
	(SA)(FA)(NA)(W)2-XIII	-1323.56	72.213	63.943	60.048	-1321.09	-1322.19	-1322.52
	(SA)(FA)(NA)(W)2-XIV	-1323.56	72.884	64.724	60.877	-1321.1	-1322.19	-1322.52
3-waters:
	Structure	ωB97X-D/6-31++G** Electronic Energy (Hartrees)	ωB97X-D/6-31++G** Gº Correction 216.65 K (kcal/mol)	ωB97X-D/6-31++G** Gº Correction 273.15 K (kcal/mol)	ωB97X-D/6-31++G** Gº Correction 298.15 K (kcal/mol)	DLPNO-CCSD(T)/cc-pVDZ //ωB97X-D/6-31++G** (Hartrees)	DLPNO-CCSD(T)/cc-pVTZ //ωB97X-D/6-31++G** (Hartrees)	DLPNO-CCSD(T)/cc-pVQZ //ωB97X-D/6-31++G** (Hartrees)
	(SA)(FA)(NA)(W)3-I	-1400	88.729	80.282	76.286	-1397.36	-1398.54	-1398.9
	(SA)(FA)(NA)(W)3-II	-1399.99	86.576	77.679	73.472	-1397.36	-1398.54	-1398.9
	(SA)(FA)(NA)(W)3-III	-1399.99	88.429	79.894	75.858	-1397.36	-1398.54	-1398.9
	(SA)(FA)(NA)(W)3-IV	-1399.99	86.926	78.059	73.867	-1397.36	-1398.54	-1398.9
	(SA)(FA)(NA)(W)3-V	-1399.99	85.814	76.73	72.439	-1397.36	-1398.54	-1398.9
	(SA)(FA)(NA)(W)3-VI	-1399.99	86.47	77.566	73.357	-1397.36	-1398.54	-1398.9
	(SA)(FA)(NA)(W)3-VII	-1399.99	86.762	77.843	73.627	-1397.36	-1398.54	-1398.9
	(SA)(FA)(NA)(W)3-VIII	-1400	89.193	80.885	76.952	-1397.37	-1398.54	-1398.9
	(SA)(FA)(NA)(W)3-IX	-1400	89.196	80.802	76.83	-1397.37	-1398.54	-1398.9
	(SA)(FA)(NA)(W)3-X	-1399.99	87.344	78.484	74.297	-1397.36	-1398.54	-1398.9
	(SA)(FA)(NA)(W)3-XI	-1399.99	88.805	80.372	76.38	-1397.36	-1398.54	-1398.9

## Sheet: (SA)(FA)(HCl)
0-waters:
	Structure	ωB97X-D/6-31++G** Electronic Energy (Hartrees)	ωB97X-D/6-31++G** Gº Correction 216.65 K (kcal/mol)	ωB97X-D/6-31++G** Gº Correction 273.15 K (kcal/mol)	ωB97X-D/6-31++G** Gº Correction 298.15 K (kcal/mol)	DLPNO-CCSD(T)/cc-pVDZ //ωB97X-D/6-31++G** (Hartrees)	DLPNO-CCSD(T)/cc-pVTZ //ωB97X-D/6-31++G** (Hartrees)	DLPNO-CCSD(T)/cc-pVQZ //ωB97X-D/6-31++G** (Hartrees)
	(SA)(FA)(HCl)-I	-1350.66	35.092	29.162	26.39	-1348.58	-1349.3	-1349.52
1-water:
	Structure	ωB97X-D/6-31++G** Electronic Energy (Hartrees)	ωB97X-D/6-31++G** Gº Correction 216.65 K (kcal/mol)	ωB97X-D/6-31++G** Gº Correction 273.15 K (kcal/mol)	ωB97X-D/6-31++G** Gº Correction 298.15 K (kcal/mol)	DLPNO-CCSD(T)/cc-pVDZ //ωB97X-D/6-31++G** (Hartrees)	DLPNO-CCSD(T)/cc-pVTZ //ωB97X-D/6-31++G** (Hartrees)	DLPNO-CCSD(T)/cc-pVQZ //ωB97X-D/6-31++G** (Hartrees)
	(SA)(FA)(HCl)(W)-I	-1427.1	48.964	42.304	39.177	-1424.85	-1425.65	-1425.9
	(SA)(FA)(HCl)(W)-II	-1427.1	49.106	42.444	39.318	-1424.85	-1425.66	-1425.9
	(SA)(FA)(HCl)(W)-III	-1427.1	48.54	41.801	38.64	-1424.84	-1425.65	-1425.9
	(SA)(FA)(HCl)(W)-IV	-1427.09	47.707	40.708	37.428	-1424.84	-1425.65	-1425.89
	(SA)(FA)(HCl)(W)-V	-1427.1	48.916	42.24	39.107	-1424.85	-1425.65	-1425.9
2-waters:
	Structure	ωB97X-D/6-31++G** Electronic Energy (Hartrees)	ωB97X-D/6-31++G** Gº Correction 216.65 K (kcal/mol)	ωB97X-D/6-31++G** Gº Correction 273.15 K (kcal/mol)	ωB97X-D/6-31++G** Gº Correction 298.15 K (kcal/mol)	DLPNO-CCSD(T)/cc-pVDZ //ωB97X-D/6-31++G** (Hartrees)	DLPNO-CCSD(T)/cc-pVTZ //ωB97X-D/6-31++G** (Hartrees)	DLPNO-CCSD(T)/cc-pVQZ //ωB97X-D/6-31++G** (Hartrees)
	(SA)(FA)(HCl)(W)2-I	-1503.53	62.447	54.943	51.41	-1501.11	-1502	-1502.27
	(SA)(FA)(HCl)(W)2-II	-1503.52	61.646	54.016	50.427	-1501.11	-1502	-1502.27
	(SA)(FA)(HCl)(W)2-III	-1503.53	62.358	54.819	51.27	-1501.11	-1502	-1502.27
	(SA)(FA)(HCl)(W)2-IV	-1503.53	62.727	55.31	51.816	-1501.11	-1502	-1502.27
	(SA)(FA)(HCl)(W)2-V	-1503.53	63	55.644	52.177	-1501.11	-1502.01	-1502.28
	(SA)(FA)(HCl)(W)2-VI	-1503.53	63.633	56.332	52.893	-1501.11	-1502.01	-1502.28
	(SA)(FA)(HCl)(W)2-VII	-1503.53	63.809	56.538	53.112	-1501.11	-1502.01	-1502.28
	(SA)(FA)(HCl)(W)2-VIII	-1503.53	62.373	54.841	51.296	-1501.11	-1502	-1502.27
	(SA)(FA)(HCl)(W)2-IX	-1503.53	63.243	55.929	52.481	-1501.11	-1502.01	-1502.28
	(SA)(FA)(HCl)(W)2-X	-1503.53	62.771	55.339	51.838	-1501.11	-1502	-1502.27
	(SA)(FA)(HCl)(W)2-XI	-1503.53	61.989	54.465	50.924	-1501.11	-1502	-1502.27
	(SA)(FA)(HCl)(W)2-XII	-1503.53	62.811	55.395	51.905	-1501.11	-1502	-1502.27
	(SA)(FA)(HCl)(W)2-XIII	-1503.53	63.324	56.103	52.696	-1501.11	-1502.01	-1502.28
	(SA)(FA)(HCl)(W)2-XIV	-1503.53	63.524	56.317	52.917	-1501.11	-1502.01	-1502.28
	(SA)(FA)(HCl)(W)2-XV	-1503.53	62.152	54.653	51.124	-1501.11	-1502	-1502.27
	(SA)(FA)(HCl)(W)2-XVI	-1503.53	62.687	55.152	51.606	-1501.11	-1502	-1502.27
	(SA)(FA)(HCl)(W)2-XVII	-1503.53	62.723	55.406	51.96	-1501.11	-1502	-1502.27
	(SA)(FA)(HCl)(W)2-XVIII	-1503.53	62.771	55.463	52.019	-1501.11	-1502	-1502.27
	(SA)(FA)(HCl)(W)2-XIX	-1503.53	63.01	55.778	52.37	-1501.11	-1502	-1502.27
	(SA)(FA)(HCl)(W)2-XX	-1503.53	62.01	54.415	50.842	-1501.11	-1502	-1502.27
	(SA)(FA)(HCl)(W)2-XXI	-1503.53	63.688	56.519	53.137	-1501.11	-1502.01	-1502.28
	(SA)(FA)(HCl)(W)2-XXII	-1503.53	62.625	55.213	51.722	-1501.11	-1502	-1502.27
	(SA)(FA)(HCl)(W)2-XXIII	-1503.53	63.465	56.274	52.883	-1501.11	-1502.01	-1502.28
	(SA)(FA)(HCl)(W)2-XXIV	-1503.53	62.953	55.581	52.11	-1501.11	-1502	-1502.27
	(SA)(FA)(HCl)(W)2-XXV	-1503.53	63.397	56.188	52.789	-1501.11	-1502.01	-1502.28
	(SA)(FA)(HCl)(W)2-XXVI	-1503.53	62.718	55.329	51.849	-1501.11	-1502	-1502.27
	(SA)(FA)(HCl)(W)2-XXVII	-1503.53	62.527	55.066	51.55	-1501.11	-1502	-1502.27
	(SA)(FA)(HCl)(W)2-XXVIII	-1503.53	62.043	54.516	50.974	-1501.11	-1502	-1502.27
	(SA)(FA)(HCl)(W)2-XXIX	-1503.53	62.938	55.457	51.936	-1501.11	-1502	-1502.27
	(SA)(FA)(HCl)(W)2-XXX	-1503.53	63.737	56.577	53.199	-1501.11	-1502.01	-1502.28
	(SA)(FA)(HCl)(W)2-XXXI	-1503.52	62.267	54.749	51.21	-1501.11	-1502	-1502.27
3-waters:
	Structure	ωB97X-D/6-31++G** Electronic Energy (Hartrees)	ωB97X-D/6-31++G** Gº Correction 216.65 K (kcal/mol)	ωB97X-D/6-31++G** Gº Correction 273.15 K (kcal/mol)	ωB97X-D/6-31++G** Gº Correction 298.15 K (kcal/mol)	DLPNO-CCSD(T)/cc-pVDZ //ωB97X-D/6-31++G** (Hartrees)	DLPNO-CCSD(T)/cc-pVTZ //ωB97X-D/6-31++G** (Hartrees)	DLPNO-CCSD(T)/cc-pVQZ //ωB97X-D/6-31++G** (Hartrees)
	(SA)(FA)(HCl)(W)3-I	-1579.96	76.818	68.623	64.756	-1577.37	-1578.36	-1578.65
	(SA)(FA)(HCl)(W)3-II	-1579.96	77.019	68.871	65.024	-1577.37	-1578.36	-1578.65
	(SA)(FA)(HCl)(W)3-III	-1579.96	77.278	69.335	65.578	-1577.37	-1578.36	-1578.65
	(SA)(FA)(HCl)(W)3-IV	-1579.96	77.299	69.426	65.701	-1577.37	-1578.36	-1578.65
	(SA)(FA)(HCl)(W)3-V	-1579.96	76.822	68.726	64.903	-1577.37	-1578.35	-1578.65
	(SA)(FA)(HCl)(W)3-VI	-1579.96	76.911	68.866	65.064	-1577.37	-1578.35	-1578.65
	(SA)(FA)(HCl)(W)3-VII	-1579.96	76.779	68.673	64.842	-1577.37	-1578.35	-1578.65
	(SA)(FA)(HCl)(W)3-VIII	-1579.96	77.082	68.95	65.108	-1577.37	-1578.35	-1578.65
	(SA)(FA)(HCl)(W)3-IX	-1579.96	77.074	69.096	65.323	-1577.37	-1578.35	-1578.65
	(SA)(FA)(HCl)(W)3-X	-1579.96	77.02	68.969	65.164	-1577.37	-1578.36	-1578.65
	(SA)(FA)(HCl)(W)3-XI	-1579.96	78.457	70.725	67.071	-1577.37	-1578.36	-1578.65
	(SA)(FA)(HCl)(W)3-XII	-1579.96	77.713	69.719	65.944	-1577.37	-1578.36	-1578.65
	(SA)(FA)(HCl)(W)3-XIII	-1579.96	77.138	69.176	65.412	-1577.37	-1578.35	-1578.65
	(SA)(FA)(HCl)(W)3-XIV	-1579.96	77.093	69.035	65.225	-1577.37	-1578.35	-1578.65
	(SA)(FA)(HCl)(W)3-XV	-1579.96	76.429	68.459	64.695	-1577.37	-1578.35	-1578.65
	(SA)(FA)(HCl)(W)3-XVI	-1579.96	77.421	69.474	65.714	-1577.37	-1578.35	-1578.65
	(SA)(FA)(HCl)(W)3-XVII	-1579.96	76.881	68.841	65.041	-1577.37	-1578.35	-1578.65
	(SA)(FA)(HCl)(W)3-XVIII	-1579.96	76.874	68.622	64.73	-1577.37	-1578.35	-1578.65
	(SA)(FA)(HCl)(W)3-XIX	-1579.96	76.614	68.648	64.885	-1577.37	-1578.35	-1578.65
	(SA)(FA)(HCl)(W)3-XX	-1579.96	76.592	68.435	64.582	-1577.37	-1578.35	-1578.65

## Sheet: (SA)(FA)(A)
0-waters:
	Structure	ωB97X-D/6-31++G** Electronic Energy (Hartrees)	ωB97X-D/6-31++G** Gº Correction 216.65 K (kcal/mol)	ωB97X-D/6-31++G** Gº Correction 273.15 K (kcal/mol)	ωB97X-D/6-31++G** Gº Correction 298.15 K (kcal/mol)	DLPNO-CCSD(T)/cc-pVDZ //ωB97X-D/6-31++G** (Hartrees)	DLPNO-CCSD(T)/cc-pVTZ //ωB97X-D/6-31++G** (Hartrees)	DLPNO-CCSD(T)/cc-pVQZ //ωB97X-D/6-31++G** (Hartrees)
	(SA)(FA)(A)-I	-946.448	53.789	47.955	45.221	-944.743	-945.452	-945.665
	(SA)(FA)(A)-II	-946.448	53.931	48.102	45.371	-944.743	-945.452	-945.666
	(SA)(FA)(A)-III	-946.448	54.168	48.395	45.69	-944.743	-945.452	-945.666
	(SA)(FA)(A)-IV	-946.446	52.782	46.843	44.066	-944.746	-945.453	-945.665
	(SA)(FA)(A)-V	-946.444	52.223	46.221	43.416	-944.744	-945.451	-945.663
1-water:
	Structure	ωB97X-D/6-31++G** Electronic Energy (Hartrees)	ωB97X-D/6-31++G** Gº Correction 216.65 K (kcal/mol)	ωB97X-D/6-31++G** Gº Correction 273.15 K (kcal/mol)	ωB97X-D/6-31++G** Gº Correction 298.15 K (kcal/mol)	DLPNO-CCSD(T)/cc-pVDZ //ωB97X-D/6-31++G** (Hartrees)	DLPNO-CCSD(T)/cc-pVTZ //ωB97X-D/6-31++G** (Hartrees)	DLPNO-CCSD(T)/cc-pVQZ //ωB97X-D/6-31++G** (Hartrees)
	(SA)(FA)(A)(W)-I	-1022.88	68.981	62.575	59.556	-1021.01	-1021.81	-1022.05
2-waters:
	Structure	ωB97X-D/6-31++G** Electronic Energy (Hartrees)	ωB97X-D/6-31++G** Gº Correction 216.65 K (kcal/mol)	ωB97X-D/6-31++G** Gº Correction 273.15 K (kcal/mol)	ωB97X-D/6-31++G** Gº Correction 298.15 K (kcal/mol)	DLPNO-CCSD(T)/cc-pVDZ //ωB97X-D/6-31++G** (Hartrees)	DLPNO-CCSD(T)/cc-pVTZ //ωB97X-D/6-31++G** (Hartrees)	DLPNO-CCSD(T)/cc-pVQZ //ωB97X-D/6-31++G** (Hartrees)
	(SA)(FA)(A)(W)2-I	-1099.32	83.346	76.309	72.982	-1097.28	-1098.16	-1098.43
	(SA)(FA)(A)(W)2-II	-1099.32	83.686	76.699	73.395	-1097.28	-1098.16	-1098.43
3-waters:
	Structure	ωB97X-D/6-31++G** Electronic Energy (Hartrees)	ωB97X-D/6-31++G** Gº Correction 216.65 K (kcal/mol)	ωB97X-D/6-31++G** Gº Correction 273.15 K (kcal/mol)	ωB97X-D/6-31++G** Gº Correction 298.15 K (kcal/mol)	DLPNO-CCSD(T)/cc-pVDZ //ωB97X-D/6-31++G** (Hartrees)	DLPNO-CCSD(T)/cc-pVTZ //ωB97X-D/6-31++G** (Hartrees)	DLPNO-CCSD(T)/cc-pVQZ //ωB97X-D/6-31++G** (Hartrees)
	(SA)(FA)(A)(W)3-I	-1175.75	97.931	90.246	86.599	-1173.55	-1174.52	-1174.81
	(SA)(FA)(A)(W)3-II	-1175.75	97.523	89.726	86.029	-1173.54	-1174.51	-1174.81
	(SA)(FA)(A)(W)3-III	-1175.75	97.116	89.23	85.493	-1173.54	-1174.51	-1174.81

## Sheet: (SA)(FA)(DMA)
0-waters:
	Structure	ωB97X-D/6-31++G** Electronic Energy (Hartrees)	ωB97X-D/6-31++G** Gº Correction 216.65 K (kcal/mol)	ωB97X-D/6-31++G** Gº Correction 273.15 K (kcal/mol)	ωB97X-D/6-31++G** Gº Correction 298.15 K (kcal/mol)	DLPNO-CCSD(T)/cc-pVDZ //ωB97X-D/6-31++G** (Hartrees)	DLPNO-CCSD(T)/cc-pVTZ //ωB97X-D/6-31++G** (Hartrees)	DLPNO-CCSD(T)/cc-pVQZ //ωB97X-D/6-31++G** (Hartrees)
	(SA)(FA)(DMA)-I	-1025.05	87.507	80.837	77.701	-1023.13	-1023.92	-1024.16
	(SA)(FA)(DMA)-II	-1025.05	87.942	81.358	78.261	-1023.13	-1023.92	-1024.16
1-water:
	Structure	ωB97X-D/6-31++G** Electronic Energy (Hartrees)	ωB97X-D/6-31++G** Gº Correction 216.65 K (kcal/mol)	ωB97X-D/6-31++G** Gº Correction 273.15 K (kcal/mol)	ωB97X-D/6-31++G** Gº Correction 298.15 K (kcal/mol)	DLPNO-CCSD(T)/cc-pVDZ //ωB97X-D/6-31++G** (Hartrees)	DLPNO-CCSD(T)/cc-pVTZ //ωB97X-D/6-31++G** (Hartrees)	DLPNO-CCSD(T)/cc-pVQZ //ωB97X-D/6-31++G** (Hartrees)
	(SA)(FA)(DMA)(W)-I	-1101.48	101.756	94.37	90.89	-1099.39	-1100.27	-1100.54
	(SA)(FA)(DMA)(W)-II	-1101.48	101.967	94.649	91.197	-1099.4	-1100.27	-1100.54
	(SA)(FA)(DMA)(W)-III	-1101.48	102.45	95.231	91.824	-1099.4	-1100.27	-1100.54
	(SA)(FA)(DMA)(W)-IV	-1101.48	102.235	94.967	91.535	-1099.4	-1100.27	-1100.54
2-waters:
	Structure	ωB97X-D/6-31++G** Electronic Energy (Hartrees)	ωB97X-D/6-31++G** Gº Correction 216.65 K (kcal/mol)	ωB97X-D/6-31++G** Gº Correction 273.15 K (kcal/mol)	ωB97X-D/6-31++G** Gº Correction 298.15 K (kcal/mol)	DLPNO-CCSD(T)/cc-pVDZ //ωB97X-D/6-31++G** (Hartrees)	DLPNO-CCSD(T)/cc-pVTZ //ωB97X-D/6-31++G** (Hartrees)	DLPNO-CCSD(T)/cc-pVQZ //ωB97X-D/6-31++G** (Hartrees)
	(SA)(FA)(DMA)(W)2-I	-1177.91	116.674	108.754	105.005	-1175.66	-1176.63	-1176.91
	(SA)(FA)(DMA)(W)2-II	-1177.91	116.76	108.849	105.103	-1175.66	-1176.63	-1176.91
3-waters:
	Structure	ωB97X-D/6-31++G** Electronic Energy (Hartrees)	ωB97X-D/6-31++G** Gº Correction 216.65 K (kcal/mol)	ωB97X-D/6-31++G** Gº Correction 273.15 K (kcal/mol)	ωB97X-D/6-31++G** Gº Correction 298.15 K (kcal/mol)	DLPNO-CCSD(T)/cc-pVDZ //ωB97X-D/6-31++G** (Hartrees)	DLPNO-CCSD(T)/cc-pVTZ //ωB97X-D/6-31++G** (Hartrees)	DLPNO-CCSD(T)/cc-pVQZ //ωB97X-D/6-31++G** (Hartrees)
	(SA)(FA)(DMA)(W)3-I	-1254.34	130.923	122.254	118.138	-1251.92	-1252.98	-1253.29
	(SA)(FA)(DMA)(W)3-II	-1254.34	130.768	122.096	117.98	-1251.92	-1252.98	-1253.29
	(SA)(FA)(DMA)(W)3-III	-1254.34	131.504	122.924	118.847	-1251.93	-1252.98	-1253.29

## Sheet: (SA)(NA)(HCl)
0-waters:
	Structure	ωB97X-D/6-31++G** Electronic Energy (Hartrees)	ωB97X-D/6-31++G** Gº Correction 216.65 K (kcal/mol)	ωB97X-D/6-31++G** Gº Correction 273.15 K (kcal/mol)	ωB97X-D/6-31++G** Gº Correction 298.15 K (kcal/mol)	DLPNO-CCSD(T)/cc-pVDZ //ωB97X-D/6-31++G** (Hartrees)	DLPNO-CCSD(T)/cc-pVTZ //ωB97X-D/6-31++G** (Hartrees)	DLPNO-CCSD(T)/cc-pVQZ //ωB97X-D/6-31++G** (Hartrees)
	(SA)(NA)(HCl)-I	-1441.75	29.472	23.181	20.241	-1439.5	-1440.31	-1440.56
1-water:
	Structure	ωB97X-D/6-31++G** Electronic Energy (Hartrees)	ωB97X-D/6-31++G** Gº Correction 216.65 K (kcal/mol)	ωB97X-D/6-31++G** Gº Correction 273.15 K (kcal/mol)	ωB97X-D/6-31++G** Gº Correction 298.15 K (kcal/mol)	DLPNO-CCSD(T)/cc-pVDZ //ωB97X-D/6-31++G** (Hartrees)	DLPNO-CCSD(T)/cc-pVTZ //ωB97X-D/6-31++G** (Hartrees)	DLPNO-CCSD(T)/cc-pVQZ //ωB97X-D/6-31++G** (Hartrees)
	(SA)(NA)(HCl)(W)-I	-1518.19	42.113	34.87	31.476	-1515.76	-1516.66	-1516.93
	(SA)(NA)(HCl)(W)-II	-1518.19	43.333	36.311	33.015	-1515.77	-1516.66	-1516.94
	(SA)(NA)(HCl)(W)-III	-1518.19	43.29	36.274	32.982	-1515.77	-1516.66	-1516.94
	(SA)(NA)(HCl)(W)-IV	-1518.19	42.382	35.192	31.821	-1515.76	-1516.66	-1516.93
	(SA)(NA)(HCl)(W)-V	-1518.19	42.921	35.832	32.506	-1515.77	-1516.66	-1516.93
2-waters:
	Structure	ωB97X-D/6-31++G** Electronic Energy (Hartrees)	ωB97X-D/6-31++G** Gº Correction 216.65 K (kcal/mol)	ωB97X-D/6-31++G** Gº Correction 273.15 K (kcal/mol)	ωB97X-D/6-31++G** Gº Correction 298.15 K (kcal/mol)	DLPNO-CCSD(T)/cc-pVDZ //ωB97X-D/6-31++G** (Hartrees)	DLPNO-CCSD(T)/cc-pVTZ //ωB97X-D/6-31++G** (Hartrees)	DLPNO-CCSD(T)/cc-pVQZ //ωB97X-D/6-31++G** (Hartrees)
	(SA)(NA)(HCl)(W)2-I	-1594.62	56.699	48.841	45.142	-1592.03	-1593.01	-1593.31
	(SA)(NA)(HCl)(W)2-II	-1594.62	55.506	47.385	43.569	-1592.03	-1593.01	-1593.31
	(SA)(NA)(HCl)(W)2-III	-1594.62	56.804	48.957	45.263	-1592.03	-1593.01	-1593.31
3-waters:
	Structure	ωB97X-D/6-31++G** Electronic Energy (Hartrees)	ωB97X-D/6-31++G** Gº Correction 216.65 K (kcal/mol)	ωB97X-D/6-31++G** Gº Correction 273.15 K (kcal/mol)	ωB97X-D/6-31++G** Gº Correction 298.15 K (kcal/mol)	DLPNO-CCSD(T)/cc-pVDZ //ωB97X-D/6-31++G** (Hartrees)	DLPNO-CCSD(T)/cc-pVTZ //ωB97X-D/6-31++G** (Hartrees)	DLPNO-CCSD(T)/cc-pVQZ //ωB97X-D/6-31++G** (Hartrees)
	(SA)(NA)(HCl)(W)3-I	-1671.05	71.412	63.063	59.116	-1668.3	-1669.37	-1669.69
	(SA)(NA)(HCl)(W)3-II	-1671.05	72.702	64.6	60.773	-1668.3	-1669.37	-1669.69
	(SA)(NA)(HCl)(W)3-III	-1671.05	70.765	62.234	58.205	-1668.29	-1669.37	-1669.69
	(SA)(NA)(HCl)(W)3-IV	-1671.05	70.681	62.224	58.23	-1668.29	-1669.37	-1669.69
	(SA)(NA)(HCl)(W)3-V	-1671.05	71.355	62.981	59.023	-1668.3	-1669.37	-1669.69
	(SA)(NA)(HCl)(W)3-VI	-1671.05	71.389	63.066	59.129	-1668.29	-1669.37	-1669.69
	(SA)(NA)(HCl)(W)3-VII	-1671.05	70.98	62.617	58.663	-1668.29	-1669.37	-1669.69
	(SA)(NA)(HCl)(W)3-VIII	-1671.05	70.899	62.465	58.48	-1668.29	-1669.37	-1669.69
	(SA)(NA)(HCl)(W)3-IX	-1671.05	71.153	62.874	58.957	-1668.29	-1669.37	-1669.69
	(SA)(NA)(HCl)(W)3-X	-1671.05	70.889	62.551	58.607	-1668.29	-1669.36	-1669.69

## Sheet: (SA)(NA)(A)
0-waters:
	Structure	ωB97X-D/6-31++G** Electronic Energy (Hartrees)	ωB97X-D/6-31++G** Gº Correction 216.65 K (kcal/mol)	ωB97X-D/6-31++G** Gº Correction 273.15 K (kcal/mol)	ωB97X-D/6-31++G** Gº Correction 298.15 K (kcal/mol)	DLPNO-CCSD(T)/cc-pVDZ //ωB97X-D/6-31++G** (Hartrees)	DLPNO-CCSD(T)/cc-pVTZ //ωB97X-D/6-31++G** (Hartrees)	DLPNO-CCSD(T)/cc-pVQZ //ωB97X-D/6-31++G** (Hartrees)
	(SA)(NA)(A)-I	-1037.54	48.086	41.905	39.011	-1035.67	-1036.46	-1036.71
	(SA)(NA)(A)-II	-1037.54	48.868	42.826	39.994	-1035.67	-1036.46	-1036.71
	(SA)(NA)(A)-III	-1037.54	45.896	39.48	36.483	-1035.67	-1036.46	-1036.7
	(SA)(NA)(A)-IV	-1037.54	48.407	42.318	39.465	-1035.67	-1036.46	-1036.71
	(SA)(NA)(A)-V	-1037.54	48.594	42.538	39.701	-1035.67	-1036.46	-1036.71
1-water:
	Structure	ωB97X-D/6-31++G** Electronic Energy (Hartrees)	ωB97X-D/6-31++G** Gº Correction 216.65 K (kcal/mol)	ωB97X-D/6-31++G** Gº Correction 273.15 K (kcal/mol)	ωB97X-D/6-31++G** Gº Correction 298.15 K (kcal/mol)	DLPNO-CCSD(T)/cc-pVDZ //ωB97X-D/6-31++G** (Hartrees)	DLPNO-CCSD(T)/cc-pVTZ //ωB97X-D/6-31++G** (Hartrees)	DLPNO-CCSD(T)/cc-pVQZ //ωB97X-D/6-31++G** (Hartrees)
	(SA)(NA)(A)(W)-I	-1113.98	62.74	55.93	52.725	-1111.94	-1112.82	-1113.09
	(SA)(NA)(A)(W)-II	-1113.98	62.756	55.954	52.752	-1111.94	-1112.82	-1113.09
	(SA)(NA)(A)(W)-III	-1113.98	62.909	56.149	52.967	-1111.94	-1112.82	-1113.09
	(SA)(NA)(A)(W)-IV	-1113.98	62.962	56.205	53.024	-1111.94	-1112.82	-1113.09
	(SA)(NA)(A)(W)-V	-1113.98	62.261	55.329	52.069	-1111.93	-1112.82	-1113.09
	(SA)(NA)(A)(W)-VI	-1113.98	62.908	56.145	52.962	-1111.94	-1112.82	-1113.09
2-waters:
	Structure	ωB97X-D/6-31++G** Electronic Energy (Hartrees)	ωB97X-D/6-31++G** Gº Correction 216.65 K (kcal/mol)	ωB97X-D/6-31++G** Gº Correction 273.15 K (kcal/mol)	ωB97X-D/6-31++G** Gº Correction 298.15 K (kcal/mol)	DLPNO-CCSD(T)/cc-pVDZ //ωB97X-D/6-31++G** (Hartrees)	DLPNO-CCSD(T)/cc-pVTZ //ωB97X-D/6-31++G** (Hartrees)	DLPNO-CCSD(T)/cc-pVQZ //ωB97X-D/6-31++G** (Hartrees)
	(SA)(NA)(A)(W)2-I	-1190.41	77.019	69.449	65.871	-1188.2	-1189.17	-1189.47
	(SA)(NA)(A)(W)2-II	-1190.41	77.207	69.677	66.116	-1188.2	-1189.17	-1189.47
	(SA)(NA)(A)(W)2-III	-1190.41	77.408	69.997	66.494	-1188.2	-1189.17	-1189.47
	(SA)(NA)(A)(W)2-IV	-1190.41	77.521	70.13	66.636	-1188.2	-1189.17	-1189.47
	(SA)(NA)(A)(W)2-V	-1190.41	77.315	69.894	66.386	-1188.2	-1189.17	-1189.47
	(SA)(NA)(A)(W)2-VI	-1190.41	77.002	69.474	65.92	-1188.2	-1189.17	-1189.47
	(SA)(NA)(A)(W)2-VII	-1190.41	77.425	70.012	66.508	-1188.2	-1189.17	-1189.47
	(SA)(NA)(A)(W)2-VIII	-1190.41	76.913	69.349	65.776	-1188.2	-1189.17	-1189.47
	(SA)(NA)(A)(W)2-IX	-1190.41	77.506	70.094	66.59	-1188.2	-1189.17	-1189.47
	(SA)(NA)(A)(W)2-X	-1190.41	77.764	70.361	66.859	-1188.2	-1189.18	-1189.47
	(SA)(NA)(A)(W)2-XI	-1190.41	77.539	70.107	66.592	-1188.2	-1189.17	-1189.47
	(SA)(NA)(A)(W)2-XII	-1190.41	77.475	70.049	66.539	-1188.2	-1189.18	-1189.47
	(SA)(NA)(A)(W)2-XIII	-1190.41	77.751	70.407	66.935	-1188.2	-1189.17	-1189.47
3-waters:
	Structure	ωB97X-D/6-31++G** Electronic Energy (Hartrees)	ωB97X-D/6-31++G** Gº Correction 216.65 K (kcal/mol)	ωB97X-D/6-31++G** Gº Correction 273.15 K (kcal/mol)	ωB97X-D/6-31++G** Gº Correction 298.15 K (kcal/mol)	DLPNO-CCSD(T)/cc-pVDZ //ωB97X-D/6-31++G** (Hartrees)	DLPNO-CCSD(T)/cc-pVTZ //ωB97X-D/6-31++G** (Hartrees)	DLPNO-CCSD(T)/cc-pVQZ //ωB97X-D/6-31++G** (Hartrees)
	(SA)(NA)(A)(W)3-I	-1266.84	90.609	82.222	78.244	-1264.47	-1265.53	-1265.85
	(SA)(NA)(A)(W)3-II	-1266.84	90.896	82.572	78.623	-1264.47	-1265.53	-1265.85
	(SA)(NA)(A)(W)3-III	-1266.84	91.42	83.182	79.28	-1264.47	-1265.53	-1265.85
	(SA)(NA)(A)(W)3-IV	-1266.84	91.382	83.185	79.301	-1264.47	-1265.53	-1265.85
	(SA)(NA)(A)(W)3-V	-1266.84	90.651	82.246	78.266	-1264.47	-1265.53	-1265.85
	(SA)(NA)(A)(W)3-VI	-1266.84	91.202	82.956	79.05	-1264.47	-1265.53	-1265.85
	(SA)(NA)(A)(W)3-VII	-1266.84	90.838	82.459	78.489	-1264.47	-1265.53	-1265.85
	(SA)(NA)(A)(W)3-VIII	-1266.84	91.365	83.172	79.289	-1264.47	-1265.53	-1265.85

## Sheet: (SA)(NA)(DMA)
0-waters:
	Structure	ωB97X-D/6-31++G** Electronic Energy (Hartrees)	ωB97X-D/6-31++G** Gº Correction 216.65 K (kcal/mol)	ωB97X-D/6-31++G** Gº Correction 273.15 K (kcal/mol)	ωB97X-D/6-31++G** Gº Correction 298.15 K (kcal/mol)	DLPNO-CCSD(T)/cc-pVDZ //ωB97X-D/6-31++G** (Hartrees)	DLPNO-CCSD(T)/cc-pVTZ //ωB97X-D/6-31++G** (Hartrees)	DLPNO-CCSD(T)/cc-pVQZ //ωB97X-D/6-31++G** (Hartrees)
	(SA)(NA)(DMA)-I	-1116.15	82.02	75.057	71.787	-1114.05	-1114.93	-1115.2
	(SA)(NA)(DMA)-II	-1116.15	82.073	75.124	71.858	-1114.05	-1114.93	-1115.2
	(SA)(NA)(DMA)-III	-1116.15	82.29	75.404	72.168	-1114.05	-1114.93	-1115.2
1-water:
	Structure	ωB97X-D/6-31++G** Electronic Energy (Hartrees)	ωB97X-D/6-31++G** Gº Correction 216.65 K (kcal/mol)	ωB97X-D/6-31++G** Gº Correction 273.15 K (kcal/mol)	ωB97X-D/6-31++G** Gº Correction 298.15 K (kcal/mol)	DLPNO-CCSD(T)/cc-pVDZ //ωB97X-D/6-31++G** (Hartrees)	DLPNO-CCSD(T)/cc-pVTZ //ωB97X-D/6-31++G** (Hartrees)	DLPNO-CCSD(T)/cc-pVQZ //ωB97X-D/6-31++G** (Hartrees)
	(SA)(NA)(DMA)(W)-I	-1192.58	96.209	88.53	84.91	-1190.32	-1191.29	-1191.58
	(SA)(NA)(DMA)(W)-II	-1192.58	97.626	90.296	86.828	-1190.33	-1191.29	-1191.58
	(SA)(NA)(DMA)(W)-III	-1192.58	96.697	89.12	85.547	-1190.32	-1191.29	-1191.58
	(SA)(NA)(DMA)(W)-IV	-1192.58	96.186	88.524	84.913	-1190.32	-1191.28	-1191.58
	(SA)(NA)(DMA)(W)-V	-1192.58	97.288	89.9	86.406	-1190.32	-1191.29	-1191.58
	(SA)(NA)(DMA)(W)-VI	-1192.58	96.717	89.151	85.583	-1190.32	-1191.29	-1191.58
	(SA)(NA)(DMA)(W)-VII	-1192.58	96.35	88.749	85.164	-1190.32	-1191.29	-1191.58
	(SA)(NA)(DMA)(W)-VIII	-1192.58	96.827	89.285	85.727	-1190.32	-1191.29	-1191.58
	(SA)(NA)(DMA)(W)-IX	-1192.58	96.269	88.644	85.048	-1190.32	-1191.29	-1191.58
	(SA)(NA)(DMA)(W)-X	-1192.58	96.606	88.978	85.377	-1190.32	-1191.29	-1191.58
	(SA)(NA)(DMA)(W)-XI	-1192.58	96.361	88.747	85.157	-1190.32	-1191.29	-1191.58
	(SA)(NA)(DMA)(W)-XII	-1192.58	96.582	88.974	85.381	-1190.32	-1191.29	-1191.58
	(SA)(NA)(DMA)(W)-XIII	-1192.58	96.371	88.702	85.082	-1190.32	-1191.29	-1191.58
	(SA)(NA)(DMA)(W)-XIV	-1192.58	97.003	89.498	85.956	-1190.32	-1191.29	-1191.58
	(SA)(NA)(DMA)(W)-XV	-1192.58	97.615	90.287	86.819	-1190.32	-1191.29	-1191.58
	(SA)(NA)(DMA)(W)-XVI	-1192.58	96.962	89.424	85.864	-1190.32	-1191.29	-1191.58
	(SA)(NA)(DMA)(W)-XVII	-1192.58	96.803	89.288	85.742	-1190.32	-1191.29	-1191.58
2-waters:
	Structure	ωB97X-D/6-31++G** Electronic Energy (Hartrees)	ωB97X-D/6-31++G** Gº Correction 216.65 K (kcal/mol)	ωB97X-D/6-31++G** Gº Correction 273.15 K (kcal/mol)	ωB97X-D/6-31++G** Gº Correction 298.15 K (kcal/mol)	DLPNO-CCSD(T)/cc-pVDZ //ωB97X-D/6-31++G** (Hartrees)	DLPNO-CCSD(T)/cc-pVTZ //ωB97X-D/6-31++G** (Hartrees)	DLPNO-CCSD(T)/cc-pVQZ //ωB97X-D/6-31++G** (Hartrees)
	(SA)(NA)(DMA)(W)2-I	-1269.01	110.883	102.612	98.694	-1266.59	-1267.64	-1267.96
	(SA)(NA)(DMA)(W)2-II	-1269.01	111.202	103.001	99.114	-1266.59	-1267.64	-1267.96
	(SA)(NA)(DMA)(W)2-III	-1269.01	111.174	102.988	99.107	-1266.59	-1267.64	-1267.96
	(SA)(NA)(DMA)(W)2-IV	-1269.01	110.556	102.19	98.234	-1266.58	-1267.64	-1267.96
	(SA)(NA)(DMA)(W)2-V	-1269.01	111.052	102.795	98.884	-1266.59	-1267.64	-1267.96
	(SA)(NA)(DMA)(W)2-VI	-1269.01	110.567	102.204	98.243	-1266.58	-1267.64	-1267.96
	(SA)(NA)(DMA)(W)2-VII	-1269.01	111.708	103.541	99.671	-1266.59	-1267.64	-1267.96
	(SA)(NA)(DMA)(W)2-VIII	-1269.01	111.311	103.084	99.185	-1266.59	-1267.64	-1267.96
	(SA)(NA)(DMA)(W)2-IX	-1269.01	111.773	103.625	99.763	-1266.59	-1267.64	-1267.96
	(SA)(NA)(DMA)(W)2-X	-1269.01	110.671	102.337	98.393	-1266.58	-1267.64	-1267.96
	(SA)(NA)(DMA)(W)2-XI	-1269.01	110.344	102.029	98.092	-1266.59	-1267.64	-1267.96
	(SA)(NA)(DMA)(W)2-XII	-1269.01	111.022	102.742	98.821	-1266.58	-1267.64	-1267.96
	(SA)(NA)(DMA)(W)2-XIII	-1269.01	110.153	101.727	97.738	-1266.58	-1267.64	-1267.95
	(SA)(NA)(DMA)(W)2-XIV	-1269.01	111.225	103.192	99.388	-1266.59	-1267.64	-1267.96
	(SA)(NA)(DMA)(W)2-XV	-1269.01	110.828	102.569	98.663	-1266.58	-1267.64	-1267.96
	(SA)(NA)(DMA)(W)2-XVI	-1269.01	111.756	103.602	99.738	-1266.59	-1267.64	-1267.96
3-waters:
	Structure	ωB97X-D/6-31++G** Electronic Energy (Hartrees)	ωB97X-D/6-31++G** Gº Correction 216.65 K (kcal/mol)	ωB97X-D/6-31++G** Gº Correction 273.15 K (kcal/mol)	ωB97X-D/6-31++G** Gº Correction 298.15 K (kcal/mol)	DLPNO-CCSD(T)/cc-pVDZ //ωB97X-D/6-31++G** (Hartrees)	DLPNO-CCSD(T)/cc-pVTZ //ωB97X-D/6-31++G** (Hartrees)	DLPNO-CCSD(T)/cc-pVQZ //ωB97X-D/6-31++G** (Hartrees)
	(SA)(NA)(DMA)(W)3-I	-1345.44	125.476	116.515	112.258	-1342.85	-1343.99	-1344.34
	(SA)(NA)(DMA)(W)3-II	-1345.44	125.39	116.402	112.133	-1342.85	-1343.99	-1344.34
	(SA)(NA)(DMA)(W)3-III	-1345.44	125.325	116.374	112.125	-1342.85	-1343.99	-1344.34
	(SA)(NA)(DMA)(W)3-IV	-1345.44	125.603	116.702	112.476	-1342.85	-1343.99	-1344.34
	(SA)(NA)(DMA)(W)3-V	-1345.44	125.683	116.777	112.545	-1342.85	-1343.99	-1344.34
	(SA)(NA)(DMA)(W)3-VI	-1345.44	125.438	116.481	112.227	-1342.85	-1343.99	-1344.34
	(SA)(NA)(DMA)(W)3-VII	-1345.44	125.818	116.934	112.716	-1342.85	-1343.99	-1344.34
	(SA)(NA)(DMA)(W)3-VIII	-1345.44	125.986	117.167	112.977	-1342.85	-1343.99	-1344.34
	(SA)(NA)(DMA)(W)3-IX	-1345.44	126.538	117.82	113.676	-1342.85	-1343.99	-1344.34
	(SA)(NA)(DMA)(W)3-X	-1345.44	126.053	117.223	113.028	-1342.85	-1343.99	-1344.34

## Sheet: (SA)(HCl)(A)
0-waters:
	Structure	ωB97X-D/6-31++G** Electronic Energy (Hartrees)	ωB97X-D/6-31++G** Gº Correction 216.65 K (kcal/mol)	ωB97X-D/6-31++G** Gº Correction 273.15 K (kcal/mol)	ωB97X-D/6-31++G** Gº Correction 298.15 K (kcal/mol)	DLPNO-CCSD(T)/cc-pVDZ //ωB97X-D/6-31++G** (Hartrees)	DLPNO-CCSD(T)/cc-pVTZ //ωB97X-D/6-31++G** (Hartrees)	DLPNO-CCSD(T)/cc-pVQZ //ωB97X-D/6-31++G** (Hartrees)
	(SA)(HCl)(A)-I	-1217.51	41.001	35.863	33.464	-1215.68	-1216.28	-1216.46
1-water:
	Structure	ωB97X-D/6-31++G** Electronic Energy (Hartrees)	ωB97X-D/6-31++G** Gº Correction 216.65 K (kcal/mol)	ωB97X-D/6-31++G** Gº Correction 273.15 K (kcal/mol)	ωB97X-D/6-31++G** Gº Correction 298.15 K (kcal/mol)	DLPNO-CCSD(T)/cc-pVDZ //ωB97X-D/6-31++G** (Hartrees)	DLPNO-CCSD(T)/cc-pVTZ //ωB97X-D/6-31++G** (Hartrees)	DLPNO-CCSD(T)/cc-pVQZ //ωB97X-D/6-31++G** (Hartrees)
	(SA)(HCl)(A)(W)-I	-1293.94	51.989	45.811	42.914	-1291.94	-1292.63	-1292.84
	(SA)(HCl)(A)(W)-II	-1293.95	54.863	48.881	46.069	-1291.95	-1292.64	-1292.84
	(SA)(HCl)(A)(W)-III	-1293.94	52.32	46.234	43.376	-1291.94	-1292.63	-1292.84
	(SA)(HCl)(A)(W)-IV	-1293.95	55.955	50.283	47.615	-1291.95	-1292.64	-1292.85
	(SA)(HCl)(A)(W)-V	-1293.95	55.114	49.239	46.477	-1291.95	-1292.64	-1292.84
2-waters:
	Structure	ωB97X-D/6-31++G** Electronic Energy (Hartrees)	ωB97X-D/6-31++G** Gº Correction 216.65 K (kcal/mol)	ωB97X-D/6-31++G** Gº Correction 273.15 K (kcal/mol)	ωB97X-D/6-31++G** Gº Correction 298.15 K (kcal/mol)	DLPNO-CCSD(T)/cc-pVDZ //ωB97X-D/6-31++G** (Hartrees)	DLPNO-CCSD(T)/cc-pVTZ //ωB97X-D/6-31++G** (Hartrees)	DLPNO-CCSD(T)/cc-pVQZ //ωB97X-D/6-31++G** (Hartrees)
	(SA)(HCl)(A)(W)2-I	-1370.38	69.721	63.232	60.165	-1368.21	-1368.99	-1369.22
	(SA)(HCl)(A)(W)2-II	-1370.38	69.825	63.422	60.395	-1368.22	-1368.99	-1369.22
	(SA)(HCl)(A)(W)2-III	-1370.37	66.146	59.194	55.917	-1368.21	-1368.98	-1369.22
	(SA)(HCl)(A)(W)2-IV	-1370.37	65.954	59.014	55.746	-1368.21	-1368.98	-1369.22
	(SA)(HCl)(A)(W)2-V	-1370.38	69.827	63.422	60.394	-1368.22	-1368.99	-1369.22
	(SA)(HCl)(A)(W)2-VI	-1370.38	68.15	61.336	58.125	-1368.21	-1368.99	-1369.22
	(SA)(HCl)(A)(W)2-VII	-1370.37	66.312	59.381	56.114	-1368.21	-1368.98	-1369.22
	(SA)(HCl)(A)(W)2-VIII	-1370.37	65.835	58.863	55.578	-1368.21	-1368.98	-1369.21
	(SA)(HCl)(A)(W)2-IX	-1370.37	66.507	59.629	56.385	-1368.21	-1368.98	-1369.22
	(SA)(HCl)(A)(W)2-X	-1370.38	67.049	60.266	57.065	-1368.21	-1368.99	-1369.22
	(SA)(HCl)(A)(W)2-XI	-1370.38	68.059	61.229	58.009	-1368.21	-1368.99	-1369.22
	(SA)(HCl)(A)(W)2-XII	-1370.38	69.764	63.381	60.371	-1368.22	-1368.99	-1369.22
	(SA)(HCl)(A)(W)2-XIII	-1370.38	69.318	62.857	59.807	-1368.21	-1368.99	-1369.22
	(SA)(HCl)(A)(W)2-XIV	-1370.37	66.942	60.129	56.914	-1368.21	-1368.99	-1369.22
	(SA)(HCl)(A)(W)2-XV	-1370.38	68.154	61.335	58.119	-1368.21	-1368.99	-1369.22
	(SA)(HCl)(A)(W)2-XVI	-1370.37	67.415	60.519	57.264	-1368.21	-1368.98	-1369.22
	(SA)(HCl)(A)(W)2-XVII	-1370.37	66.898	60.046	56.813	-1368.21	-1368.98	-1369.22
	(SA)(HCl)(A)(W)2-XVIII	-1370.37	66.895	60.11	56.908	-1368.21	-1368.98	-1369.22
	(SA)(HCl)(A)(W)2-XIX	-1370.38	67.466	60.794	57.642	-1368.21	-1368.99	-1369.22
	(SA)(HCl)(A)(W)2-XX	-1370.37	66.258	59.404	56.174	-1368.21	-1368.98	-1369.22
	(SA)(HCl)(A)(W)2-XXI	-1370.37	67.84	61	57.775	-1368.21	-1368.99	-1369.22
	(SA)(HCl)(A)(W)2-XXII	-1370.38	67.582	60.914	57.764	-1368.21	-1368.99	-1369.22
	(SA)(HCl)(A)(W)2-XXIII	-1370.37	66.691	59.88	56.665	-1368.21	-1368.98	-1369.22
3-waters:
	Structure	ωB97X-D/6-31++G** Electronic Energy (Hartrees)	ωB97X-D/6-31++G** Gº Correction 216.65 K (kcal/mol)	ωB97X-D/6-31++G** Gº Correction 273.15 K (kcal/mol)	ωB97X-D/6-31++G** Gº Correction 298.15 K (kcal/mol)	DLPNO-CCSD(T)/cc-pVDZ //ωB97X-D/6-31++G** (Hartrees)	DLPNO-CCSD(T)/cc-pVTZ //ωB97X-D/6-31++G** (Hartrees)	DLPNO-CCSD(T)/cc-pVQZ //ωB97X-D/6-31++G** (Hartrees)
	(SA)(HCl)(A)(W)3-I	-1446.81	83.012	75.698	72.24	-1444.48	-1445.34	-1445.6
	(SA)(HCl)(A)(W)3-II	-1446.82	84.169	77.051	73.675	-1444.48	-1445.35	-1445.6
	(SA)(HCl)(A)(W)3-III	-1446.81	83.952	76.853	73.49	-1444.48	-1445.34	-1445.6
	(SA)(HCl)(A)(W)3-IV	-1446.81	83.839	76.694	73.311	-1444.48	-1445.34	-1445.6
	(SA)(HCl)(A)(W)3-V	-1446.81	83.977	76.87	73.503	-1444.48	-1445.34	-1445.6
	(SA)(HCl)(A)(W)3-VI	-1446.81	83.213	75.945	72.509	-1444.48	-1445.34	-1445.6
	(SA)(HCl)(A)(W)3-VII	-1446.81	83.84	76.698	73.317	-1444.48	-1445.34	-1445.6
	(SA)(HCl)(A)(W)3-VIII	-1446.81	83.505	76.33	72.934	-1444.48	-1445.34	-1445.6

## Sheet: (SA)(HCl)(DMA)
0-waters:
	Structure	ωB97X-D/6-31++G** Electronic Energy (Hartrees)	ωB97X-D/6-31++G** Gº Correction 216.65 K (kcal/mol)	ωB97X-D/6-31++G** Gº Correction 273.15 K (kcal/mol)	ωB97X-D/6-31++G** Gº Correction 298.15 K (kcal/mol)	DLPNO-CCSD(T)/cc-pVDZ //ωB97X-D/6-31++G** (Hartrees)	DLPNO-CCSD(T)/cc-pVTZ //ωB97X-D/6-31++G** (Hartrees)	DLPNO-CCSD(T)/cc-pVQZ //ωB97X-D/6-31++G** (Hartrees)
	(SA)(HCl)(DMA)-I	-1296.12	74	67.826	64.937	-1294.07	-1294.75	-1294.96
1-water:
	Structure	ωB97X-D/6-31++G** Electronic Energy (Hartrees)	ωB97X-D/6-31++G** Gº Correction 216.65 K (kcal/mol)	ωB97X-D/6-31++G** Gº Correction 273.15 K (kcal/mol)	ωB97X-D/6-31++G** Gº Correction 298.15 K (kcal/mol)	DLPNO-CCSD(T)/cc-pVDZ //ωB97X-D/6-31++G** (Hartrees)	DLPNO-CCSD(T)/cc-pVTZ //ωB97X-D/6-31++G** (Hartrees)	DLPNO-CCSD(T)/cc-pVQZ //ωB97X-D/6-31++G** (Hartrees)
	(SA)(HCl)(DMA)(W)-I	-1372.56	88.992	82.347	79.219	-1370.34	-1371.11	-1371.34
2-waters:
	Structure	ωB97X-D/6-31++G** Electronic Energy (Hartrees)	ωB97X-D/6-31++G** Gº Correction 216.65 K (kcal/mol)	ωB97X-D/6-31++G** Gº Correction 273.15 K (kcal/mol)	ωB97X-D/6-31++G** Gº Correction 298.15 K (kcal/mol)	DLPNO-CCSD(T)/cc-pVDZ //ωB97X-D/6-31++G** (Hartrees)	DLPNO-CCSD(T)/cc-pVTZ //ωB97X-D/6-31++G** (Hartrees)	DLPNO-CCSD(T)/cc-pVQZ //ωB97X-D/6-31++G** (Hartrees)
	(SA)(HCl)(DMA)(W)2-I	-1448.99	103.358	96.079	92.633	-1446.6	-1447.46	-1447.72
	(SA)(HCl)(DMA)(W)2-II	-1448.99	103.189	95.913	92.475	-1446.6	-1447.46	-1447.71
	(SA)(HCl)(DMA)(W)2-III	-1448.99	103.325	96.083	92.66	-1446.6	-1447.46	-1447.71
	(SA)(HCl)(DMA)(W)2-IV	-1448.99	102.999	95.672	92.207	-1446.6	-1447.46	-1447.72
	(SA)(HCl)(DMA)(W)2-V	-1448.98	103.149	95.777	92.29	-1446.6	-1447.46	-1447.71
	(SA)(HCl)(DMA)(W)2-VI	-1448.98	103.216	95.909	92.45	-1446.6	-1447.46	-1447.72
	(SA)(HCl)(DMA)(W)2-VII	-1448.98	103.529	96.283	92.851	-1446.6	-1447.46	-1447.72
	(SA)(HCl)(DMA)(W)2-VIII	-1448.99	103.179	95.947	92.529	-1446.6	-1447.46	-1447.71
	(SA)(HCl)(DMA)(W)2-IX	-1448.98	103.175	95.866	92.406	-1446.6	-1447.46	-1447.72
3-waters:
	Structure	ωB97X-D/6-31++G** Electronic Energy (Hartrees)	ωB97X-D/6-31++G** Gº Correction 216.65 K (kcal/mol)	ωB97X-D/6-31++G** Gº Correction 273.15 K (kcal/mol)	ωB97X-D/6-31++G** Gº Correction 298.15 K (kcal/mol)	DLPNO-CCSD(T)/cc-pVDZ //ωB97X-D/6-31++G** (Hartrees)	DLPNO-CCSD(T)/cc-pVTZ //ωB97X-D/6-31++G** (Hartrees)	DLPNO-CCSD(T)/cc-pVQZ //ωB97X-D/6-31++G** (Hartrees)
	(SA)(HCl)(DMA)(W)3-I	-1525.42	117.096	109.054	105.244	-1522.86	-1523.81	-1524.09
	(SA)(HCl)(DMA)(W)3-II	-1525.42	117.608	109.647	105.867	-1522.87	-1523.81	-1524.09
	(SA)(HCl)(DMA)(W)3-III	-1525.42	117.727	109.807	106.045	-1522.87	-1523.81	-1524.09
	(SA)(HCl)(DMA)(W)3-IV	-1525.41	117.353	109.371	105.581	-1522.86	-1523.81	-1524.09
	(SA)(HCl)(DMA)(W)3-V	-1525.42	117.58	109.661	105.907	-1522.87	-1523.81	-1524.09
	(SA)(HCl)(DMA)(W)3-VI	-1525.42	117.665	109.743	105.987	-1522.87	-1523.81	-1524.09
	(SA)(HCl)(DMA)(W)3-VII	-1525.42	117.371	109.439	105.675	-1522.87	-1523.81	-1524.09
	(SA)(HCl)(DMA)(W)3-VIII	-1525.42	118.892	111.302	107.698	-1522.87	-1523.82	-1524.1
	(SA)(HCl)(DMA)(W)3-IX	-1525.41	117.622	109.728	105.984	-1522.87	-1523.81	-1524.09
	(SA)(HCl)(DMA)(W)3-X	-1525.42	117.252	109.312	105.543	-1522.86	-1523.81	-1524.09
	(SA)(HCl)(DMA)(W)3-XI	-1525.42	118.311	110.508	106.798	-1522.87	-1523.81	-1524.09

## Sheet: (SA)(A)(DMA)
0-waters:
	Structure	ωB97X-D/6-31++G** Electronic Energy (Hartrees)	ωB97X-D/6-31++G** Gº Correction 216.65 K (kcal/mol)	ωB97X-D/6-31++G** Gº Correction 273.15 K (kcal/mol)	ωB97X-D/6-31++G** Gº Correction 298.15 K (kcal/mol)	DLPNO-CCSD(T)/cc-pVDZ //ωB97X-D/6-31++G** (Hartrees)	DLPNO-CCSD(T)/cc-pVTZ //ωB97X-D/6-31++G** (Hartrees)	DLPNO-CCSD(T)/cc-pVQZ //ωB97X-D/6-31++G** (Hartrees)
	(SA)(A)(DMA)-I	-891.876	89.589	83.341	80.403	-890.215	-890.883	-891.08
	(SA)(A)(DMA)-II	-891.872	88.862	82.449	79.443	-890.211	-890.88	-891.077
	(SA)(A)(DMA)-III	-891.876	90.386	84.312	81.452	-890.215	-890.885	-891.081
	(SA)(A)(DMA)-IV	-891.876	90.367	84.279	81.413	-890.215	-890.884	-891.08
	(SA)(A)(DMA)-V	-891.876	90.328	84.247	81.384	-890.215	-890.884	-891.08
1-water:
	Structure	ωB97X-D/6-31++G** Electronic Energy (Hartrees)	ωB97X-D/6-31++G** Gº Correction 216.65 K (kcal/mol)	ωB97X-D/6-31++G** Gº Correction 273.15 K (kcal/mol)	ωB97X-D/6-31++G** Gº Correction 298.15 K (kcal/mol)	DLPNO-CCSD(T)/cc-pVDZ //ωB97X-D/6-31++G** (Hartrees)	DLPNO-CCSD(T)/cc-pVTZ //ωB97X-D/6-31++G** (Hartrees)	DLPNO-CCSD(T)/cc-pVQZ //ωB97X-D/6-31++G** (Hartrees)
	(SA)(A)(DMA)(W)-I	-968.309	103.803	96.879	93.613	-966.481	-967.238	-967.46
	(SA)(A)(DMA)(W)-II	-968.308	103.551	96.581	93.294	-966.479	-967.237	-967.46
	(SA)(A)(DMA)(W)-III	-968.309	104.154	97.29	94.05	-966.481	-967.238	-967.46
	(SA)(A)(DMA)(W)-IV	-968.308	103.765	96.843	93.576	-966.48	-967.237	-967.46
	(SA)(A)(DMA)(W)-V	-968.308	103.316	96.297	92.988	-966.479	-967.236	-967.459
	(SA)(A)(DMA)(W)-VI	-968.309	104.199	97.34	94.102	-966.483	-967.239	-967.461
	(SA)(A)(DMA)(W)-VII	-968.308	104.045	97.171	93.926	-966.48	-967.237	-967.46
	(SA)(A)(DMA)(W)-VIII	-968.308	103.455	96.452	93.151	-966.48	-967.236	-967.459
2-waters:
	Structure	ωB97X-D/6-31++G** Electronic Energy (Hartrees)	ωB97X-D/6-31++G** Gº Correction 216.65 K (kcal/mol)	ωB97X-D/6-31++G** Gº Correction 273.15 K (kcal/mol)	ωB97X-D/6-31++G** Gº Correction 298.15 K (kcal/mol)	DLPNO-CCSD(T)/cc-pVDZ //ωB97X-D/6-31++G** (Hartrees)	DLPNO-CCSD(T)/cc-pVTZ //ωB97X-D/6-31++G** (Hartrees)	DLPNO-CCSD(T)/cc-pVQZ //ωB97X-D/6-31++G** (Hartrees)
	(SA)(A)(DMA)(W)2-I	-1044.74	119.133	111.713	108.196	-1042.75	-1043.59	-1043.84
	(SA)(A)(DMA)(W)2-II	-1044.74	118.249	110.625	107.011	-1042.74	-1043.59	-1043.84
	(SA)(A)(DMA)(W)2-III	-1044.74	119.776	112.473	109.01	-1042.75	-1043.59	-1043.84
	(SA)(A)(DMA)(W)2-IV	-1044.74	118.622	111.067	107.486	-1042.75	-1043.59	-1043.84
	(SA)(A)(DMA)(W)2-V	-1044.74	117.376	109.643	105.984	-1042.74	-1043.59	-1043.84
	(SA)(A)(DMA)(W)2-VI	-1044.74	119.496	112.136	108.645	-1042.75	-1043.59	-1043.84
	(SA)(A)(DMA)(W)2-VII	-1044.74	118.78	111.273	107.715	-1042.75	-1043.59	-1043.84
	(SA)(A)(DMA)(W)2-VIII	-1044.74	117.751	110.104	106.485	-1042.74	-1043.59	-1043.84
	(SA)(A)(DMA)(W)2-IX	-1044.74	118.987	111.526	107.989	-1042.75	-1043.59	-1043.84
	(SA)(A)(DMA)(W)2-X	-1044.74	118.822	111.335	107.787	-1042.75	-1043.59	-1043.84
	(SA)(A)(DMA)(W)2-XI	-1044.74	118.042	110.453	106.86	-1042.74	-1043.59	-1043.84
3-waters:
	Structure	ωB97X-D/6-31++G** Electronic Energy (Hartrees)	ωB97X-D/6-31++G** Gº Correction 216.65 K (kcal/mol)	ωB97X-D/6-31++G** Gº Correction 273.15 K (kcal/mol)	ωB97X-D/6-31++G** Gº Correction 298.15 K (kcal/mol)	DLPNO-CCSD(T)/cc-pVDZ //ωB97X-D/6-31++G** (Hartrees)	DLPNO-CCSD(T)/cc-pVTZ //ωB97X-D/6-31++G** (Hartrees)	DLPNO-CCSD(T)/cc-pVQZ //ωB97X-D/6-31++G** (Hartrees)
	(SA)(A)(DMA)(W)3-I	-1121.17	133.584	125.427	121.552	-1119.02	-1119.95	-1120.22
	(SA)(A)(DMA)(W)3-II	-1121.18	135.35	127.593	123.897	-1119.02	-1119.95	-1120.22
	(SA)(A)(DMA)(W)3-III	-1121.18	134.432	126.459	122.664	-1119.02	-1119.95	-1120.22

[truncated: 9 more sheets: (FA)(NA)(A), (FA)(NA)(DMA), (FA)(HCl)(A), (FA)(HCl)(DMA), (FA)(A)(DMA), (NA)(HCl)(A), (NA)(HCl)(DMA), (NA)(A)(DMA), (HCl)(A)(DMA)]
